# Supplementary material for: Populations and activity patterns of clouded leopards and marbled cats in Dampa Tiger Reserve, India
Source: Oxford University Press journal article supplement (doi:10.1093/jmammal/gyx104), 2017-08-01
Supplement: gyx104_suppl_Supplementary_data_S1.doc [file gyx104_suppl_Supplementary_data_S1.doc]

**Supplementary data**

**Supplementary data S1.—**Details of trap nights obtained at the 79 camera trap stations within the study area.

| Trap nights | No. of traps | Reasons for removing camera trap early |
| --- | --- | --- |
| 0 | 5 | Lost to theft or elephant damage |
| 1-40 | 6 | Lost to theft or elephant damage |
| 41-50 | 8 | Traps removed due to security reasons |
| 51-70 | 17 | Camera malfunction, lost to theft, vandalism, or elephant damage |
| >71 | 43 | Cameras removed on time |
