# Supplementary material for: Populations and activity patterns of clouded leopards and marbled cats in Dampa Tiger Reserve, India
Source: Oxford University Press journal article supplement (doi:10.1093/jmammal/gyx104), 2017-08-01
Supplement: gyx104_suppl_Supplementary_data_S2.doc [file gyx104_suppl_Supplementary_data_S2.doc]

**Supplementary data S2a.—**SPACECAP input file for clouded leopard data analysis. The file contains information of the detector at which a clouded leopard was photo-captured, identity of the individual photo-captured and the sampling occasion on which the event occurred.

| Loc ID | Animal ID | Sampling occasion |
| --- | --- | --- |
| 20 | 1 | 2 |
| 18 | 1 | 12 |
| 23 | 1 | 13 |
| 18 | 2 | 4 |
| 15 | 2 | 6 |
| 15 | 2 | 7 |
| 16 | 2 | 7 |
| 13 | 2 | 8 |
| 15 | 2 | 11 |
| 17 | 2 | 12 |
| 15 | 2 | 14 |
| 15 | 2 | 15 |
| 13 | 2 | 16 |
| 15 | 2 | 16 |
| 13 | 2 | 17 |
| 15 | 2 | 17 |
| 15 | 2 | 20 |
| 15 | 2 | 24 |
| 15 | 2 | 25 |
| 19 | 2 | 31 |
| 13 | 2 | 43 |
| 15 | 2 | 43 |
| 13 | 2 | 44 |
| 15 | 2 | 48 |
| 3 | 2 | 57 |
| 13 | 2 | 60 |
| 15 | 2 | 69 |
| 4 | 2 | 71 |
| 8 | 3 | 51 |
| 6 | 4 | 11 |
| 6 | 4 | 19 |
| 2 | 4 | 26 |
| 6 | 4 | 28 |
| 10 | 4 | 40 |
| 22 | 4 | 49 |
| 12 | 4 | 49 |
| 7 | 4 | 53 |
| 2 | 4 | 73 |
| 2 | 4 | 74 |
| 9 | 5 | 11 |
| 9 | 5 | 20 |
| 14 | 6 | 33 |
| 9 | 6 | 45 |
| 14 | 6 | 61 |
| 22 | 7 | 12 |
| 22 | 7 | 17 |
| 7 | 7 | 32 |
| 22 | 7 | 42 |
| 11 | 7 | 64 |
| 10 | 8 | 4 |
| 22 | 8 | 16 |
| 21 | 8 | 19 |
| 11 | 8 | 35 |
| 22 | 8 | 41 |
| 5 | 8 | 42 |
| 22 | 8 | 46 |
| 10 | 8 | 50 |
| 1 | 8 | 56 |
| 6 | 8 | 79 |
| 14 | 9 | 37 |
| 4 | 10 | 62 |

**Supplementary data S2b.—**SPACECAP input file for marbled cat data analysis. The file contains information of the detector at which a marbled cat was photo-captured, identity of the individual photo-captured and the sampling occasion on which the event occurred.

| Loc ID | Animal ID | Sampling occasion |
| --- | --- | --- |
| 5 | 1 | 5 |
| 5 | 1 | 10 |
| 4 | 1 | 11 |
| 4 | 1 | 17 |
| 5 | 1 | 18 |
| 6 | 1 | 19 |
| 6 | 1 | 38 |
| 4 | 1 | 43 |
| 5 | 2 | 19 |
| 5 | 2 | 25 |
| 7 | 2 | 38 |
| 7 | 2 | 42 |
| 5 | 2 | 63 |
| 5 | 3 | 41 |
| 7 | 3 | 41 |
| 8 | 4 | 62 |
| 1 | 5 | 17 |
| 3 | 6 | 22 |
| 2 | 7 | 45 |
| 2 | 8 | 60 |
| 2 | 8 | 5 |
| 7 | 9 | 47 |
| 1 | 10 | 17 |
