# Supplementary material for: Populations and activity patterns of clouded leopards and marbled cats in Dampa Tiger Reserve, India
Source: Oxford University Press journal article supplement (doi:10.1093/jmammal/gyx104), 2017-08-01
Supplement: gyx104_suppl_Supplementary_data_S3.doc [file gyx104_suppl_Supplementary_data_S3.doc]

**Supplementary data S3.—**Percentage of camera trap photographs obtained of five sympatric predators during three hour intervals in Dampa TR.

| Time (Hours) | Clouded leopard | Marbled cat | Asiatic golden cat | Leopard cat | Dhole |
| --- | --- | --- | --- | --- | --- |
| 0000-0259 | 17.3 | 2.8 | 0.0 | 18.8 | 6.1 |
| 0300-0559 | 9.9 | 5.6 | 10.0 | 25.0 | 9.2 |
| 0600-0859 | 12.3 | 19.4 | 23.3 | 3.8 | 22.1 |
| 0900-1159 | 14.8 | 16.7 | 20.0 | 1.3 | 13.5 |
| 1200-1459 | 6.2 | 16.7 | 6.7 | 0.0 | 11.0 |
| 1500-1759 | 6.2 | 30.6 | 16.7 | 8.8 | 22.1 |
| 1800-2059 | 16.0 | 5.6 | 10.0 | 20.0 | 9.8 |
| 2100-2359 | 17.3 | 2.8 | 13.3 | 22.5 | 6.1 |
